# Supplementary material for: Dauer fate in a Caenorhabditis elegans Boolean network model
Source: PeerJ journal article supplement (doi:10.7717/peerj.14713), 2023-01-23

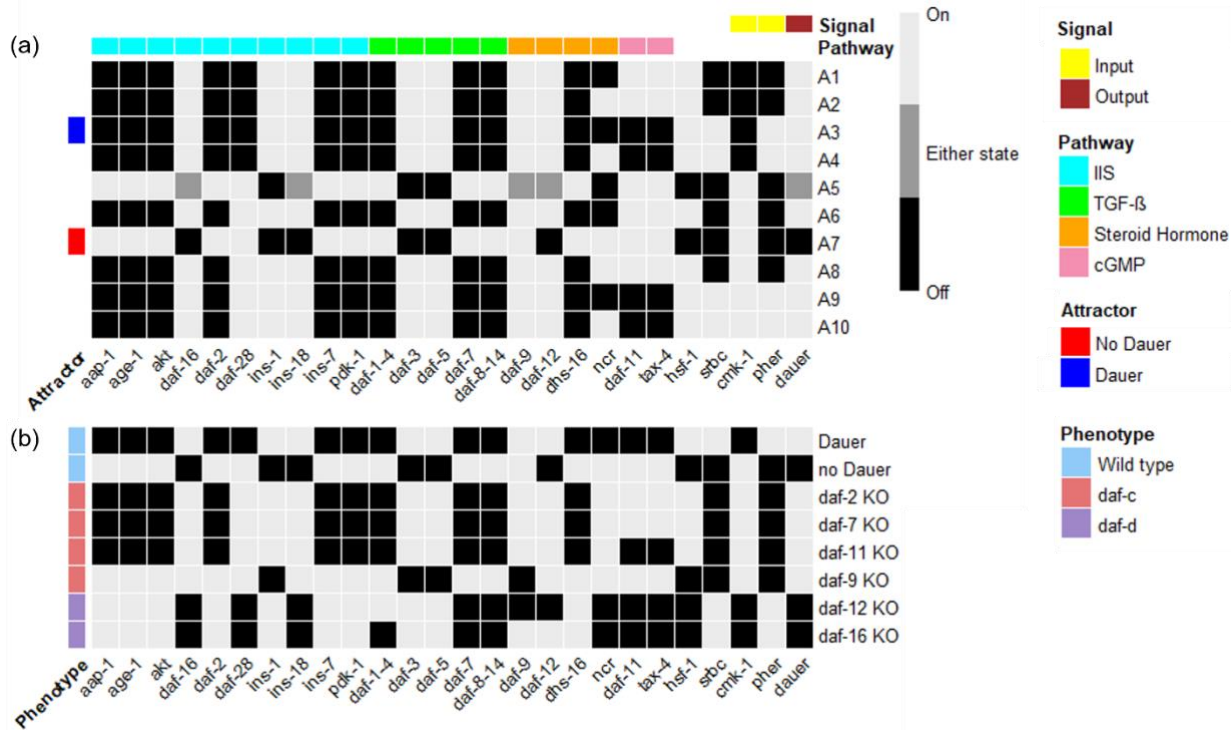

Supplement: Supplementary_figure_1.pdf [file Supplementary_figure_1.pdf]
